# Supplementary material for: From Aloe vera Leaf Waste to the Extracts with Biological Potential: Optimization of the Extractions, Physicochemical Characterization, and Biological Activities
Source: MDPI journal article supplement (doi:10.3390/plants12142744), 2023-07-24
Supplement: s1 [file s1]

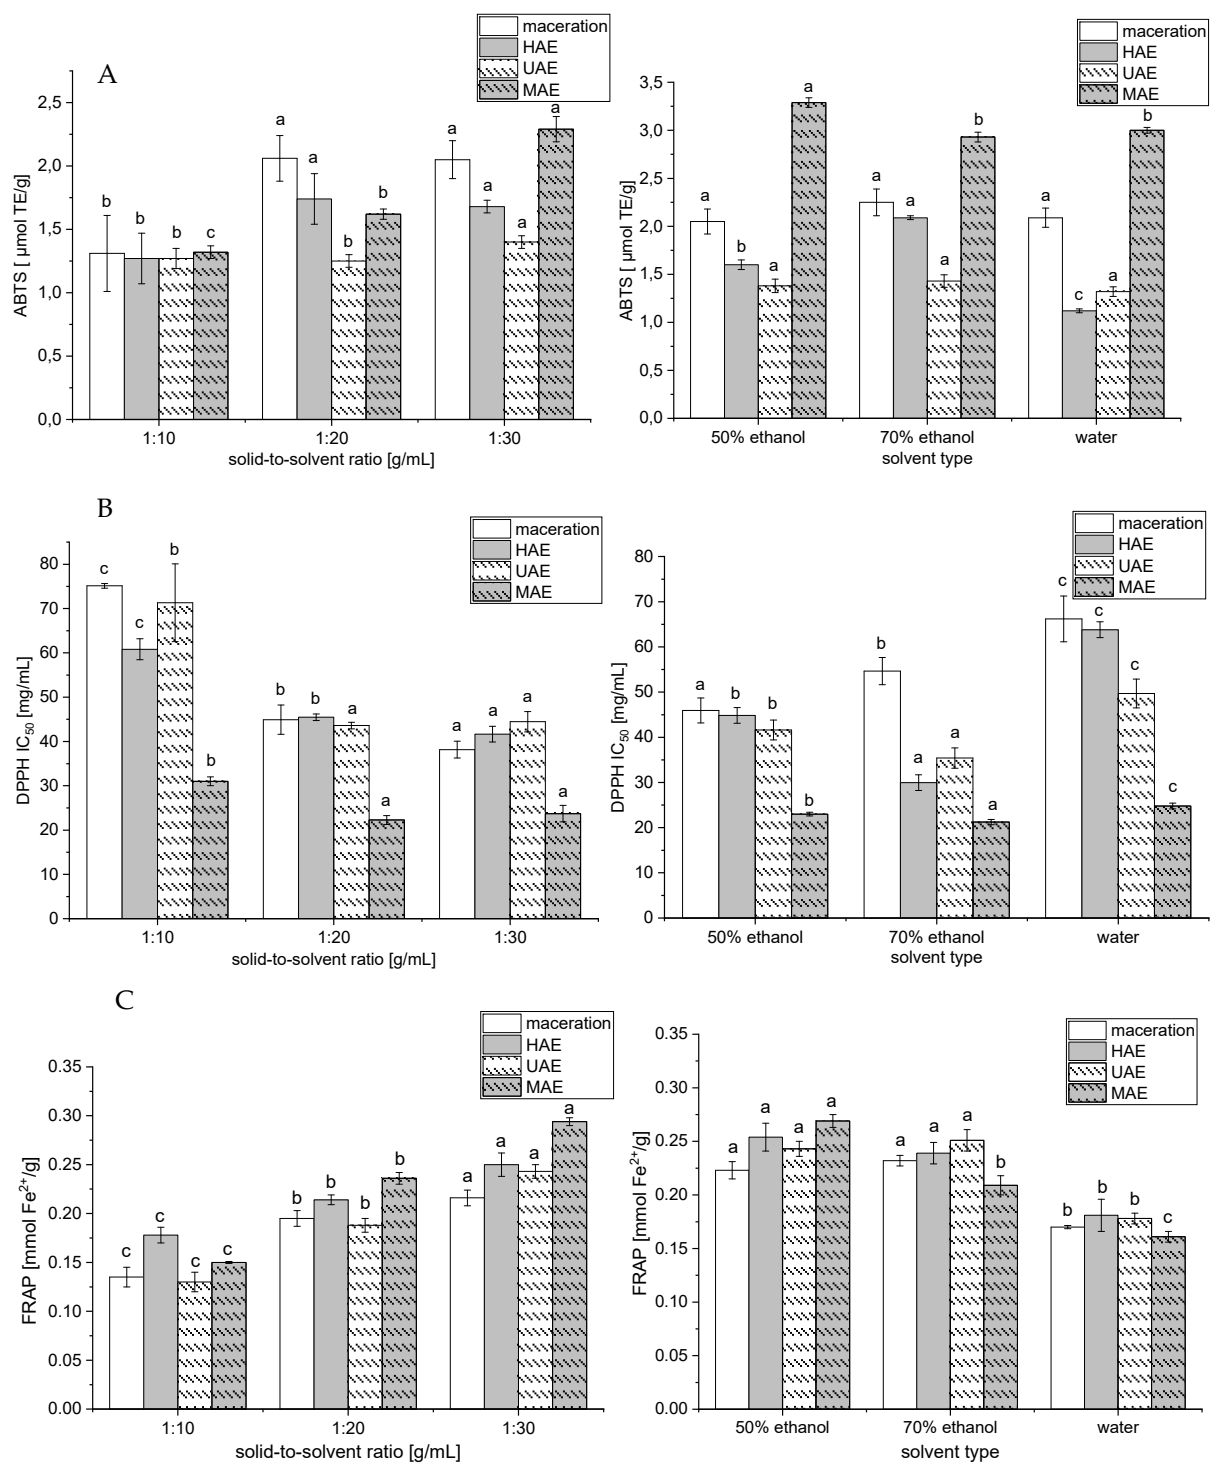

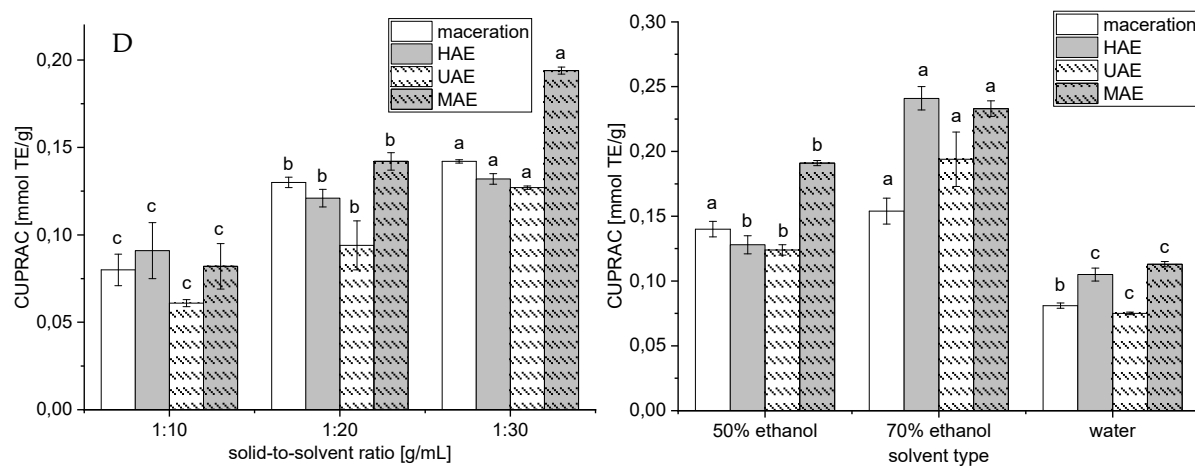

**Figure S1.** The influence of solid-to-solvent ratio and solvent type on (A) ABTS and (B) DPPH radical scavenging activity, (C) ferric reducing antioxidant power (FRAP), and (D) cupric ion-reducing antioxidant capacity (CUPRAC) of *Aloe vera* leaf waste extracts obtained in maceration, heat-, ultrasound-, and microwave-assisted extractions (HAE, UAE, and MAE, respectively).
