# Supplementary material for: From Aloe vera Leaf Waste to the Extracts with Biological Potential: Optimization of the Extractions, Physicochemical Characterization, and Biological Activities
Source: MDPI journal article supplement (doi:10.3390/plants12142744), 2023-07-24
Supplement: s1 [file s1]

**Table S3.** The antimicrobial activity of selected *Aloe vera* leaf waste extracts prepared using maceration, heat-, ultrasound- and microwave-assisted extractions (HAE, UAE, and MAE, respectively) determined using disk diffusion method.

| Microorganism                 | maceration          | HAE                 | UAE                 | MAE                 | antibiotics/fluconazole |
|-------------------------------|---------------------|---------------------|---------------------|---------------------|-------------------------|
| zone of inhibition [mm]       |                     |                     |                     |                     |                         |
| <i>Staphylococcus aureus</i>  | 12±0.5 <sup>a</sup> | 11±0.4 <sup>a</sup> | 12±0.5 <sup>a</sup> | 11±0.7 <sup>a</sup> | S                       |
| <i>Enterococcus faecalis</i>  | 3±0.3 <sup>b</sup>  | 7±0.7 <sup>a</sup>  | 6±0.4 <sup>a</sup>  | 3±0.2 <sup>b</sup>  | S                       |
| <i>Escherichia coli</i>       | R                   | R                   | R                   | R                   | R/I/S                   |
| <i>Pseudomonas aeruginosa</i> | R                   | R                   | R                   | R                   | S/I                     |
| <i>Klebsiella</i> spp.        | R                   | R                   | R                   | R                   | S/I                     |
| <i>Proteus</i> spp.           | R                   | R                   | R                   | R                   | S/I                     |
| <i>Candida albicans</i>       | R                   | R                   | R                   | R                   | S                       |

Values with the same letter in each row showed no statistically significant difference ( $p>0.05$ ;  $n=3$ ; analysis of variance, Duncan's *post-hoc* test); S, sensitive; I, intermediate sensitive; R, resistant.
