# Supplementary material for: From Aloe vera Leaf Waste to the Extracts with Biological Potential: Optimization of the Extractions, Physicochemical Characterization, and Biological Activities
Source: MDPI journal article supplement (doi:10.3390/plants12142744), 2023-07-24
Supplement: s1 [file s1]

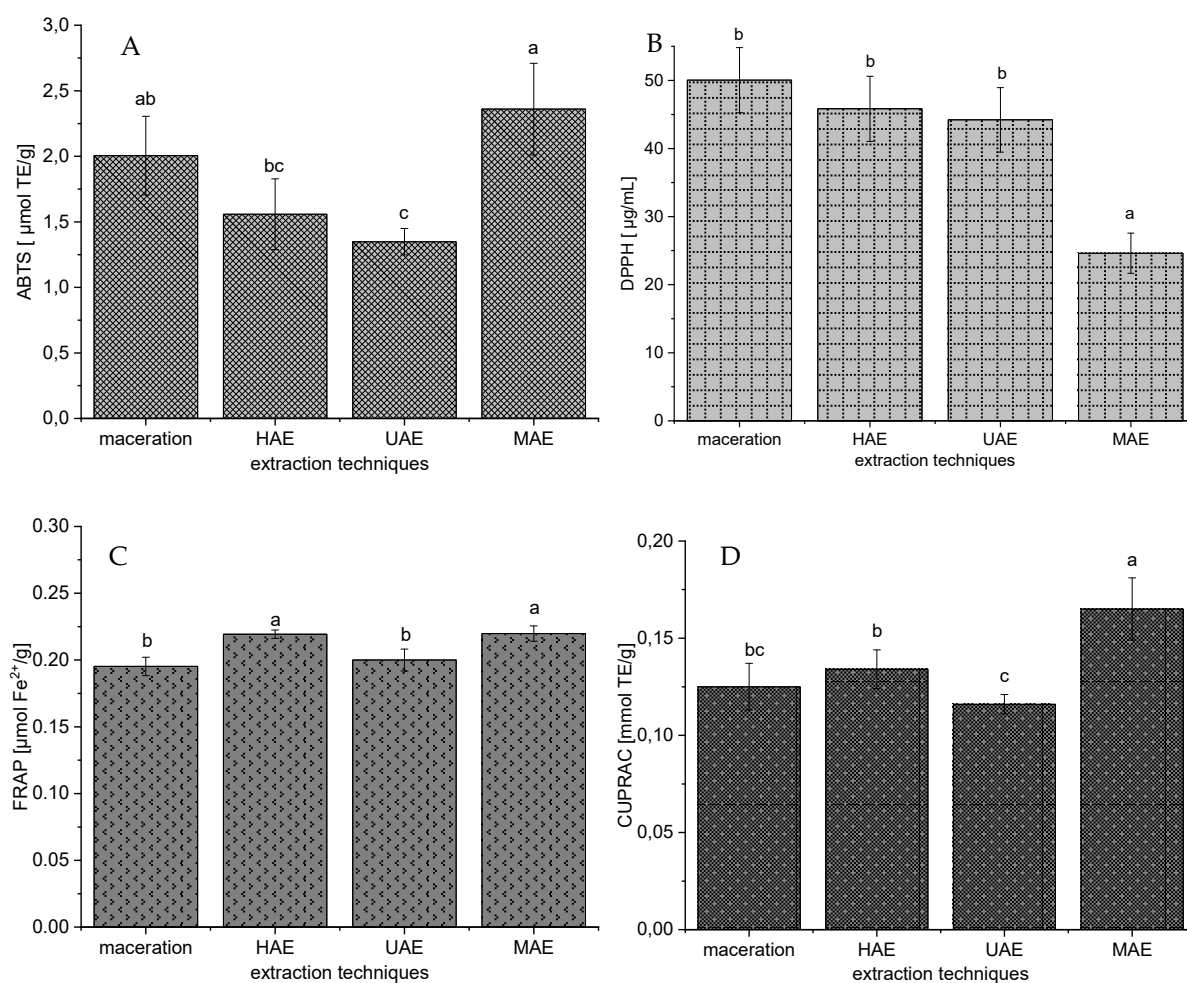

**Figure S2.** Effects of extraction techniques on (A) ABTS and (B) DPPH radical scavenging activity, (C) ferric reducing antioxidant power (FRAP), and (D) cupric ion-reducing antioxidant capacity (CUPRAC) of all prepared *Aloe vera* leaf waste extracts using maceration, heat-, ultrasound-, and microwave-assisted extractions (HAE, UAE, and MAE, respectively); different letters represent different population groups based on Duncan's *post hoc* test ( $p < 0.05$ ).
