# Supplementary material for: From Aloe vera Leaf Waste to the Extracts with Biological Potential: Optimization of the Extractions, Physicochemical Characterization, and Biological Activities
Source: MDPI journal article supplement (doi:10.3390/plants12142744), 2023-07-24
Supplement: s1 [file s1]

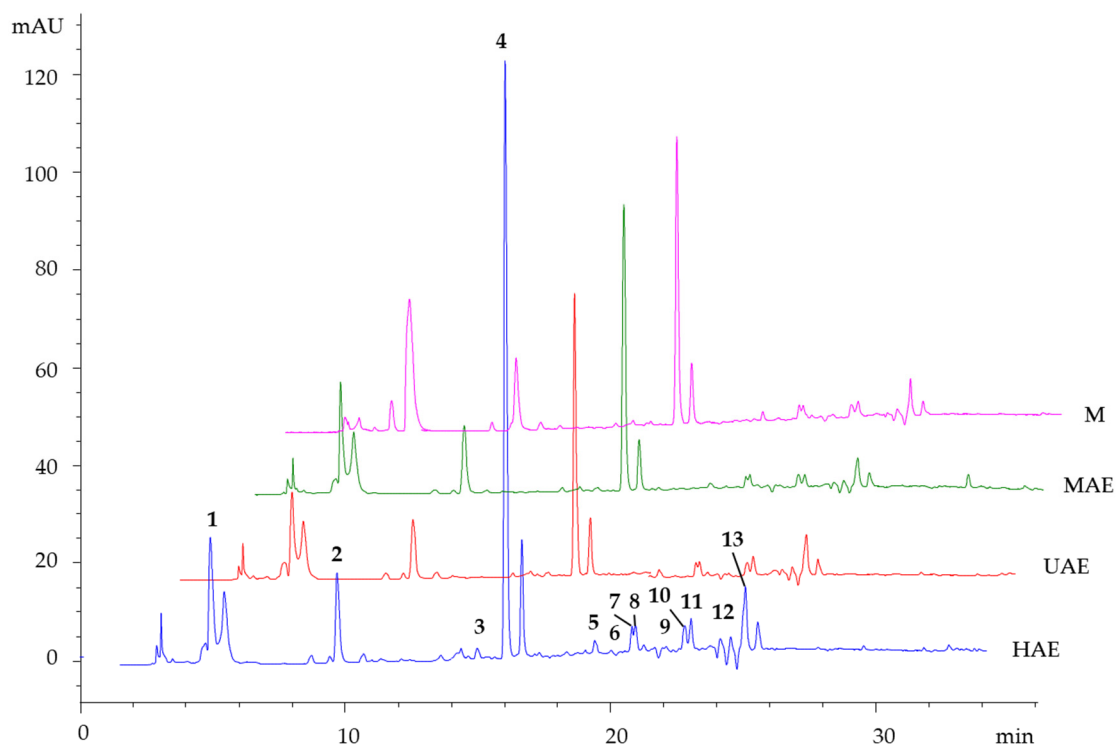

**Figure 3a.** Chromatograms of selected *Aloe vera* leaf waste extracts prepared using maceration, heat-, ultrasound- and microwave-assisted extractions (M, HAE, UAE, and MAE, respectively); 1, unknown compound; 2, hydroxymethyl aloin; 3, malonylalooin; 4, aloin hexoside derivative; 5, nataloin derivative; 6, aloin hexoside derivative; 7, aloin hexoside; 8, aloin-emodin dihexoside; 9, aloin, 10 aloin B; 11, aloin A; 12, malonylnataloin; 13, aloin-emodin hexoside derivative.

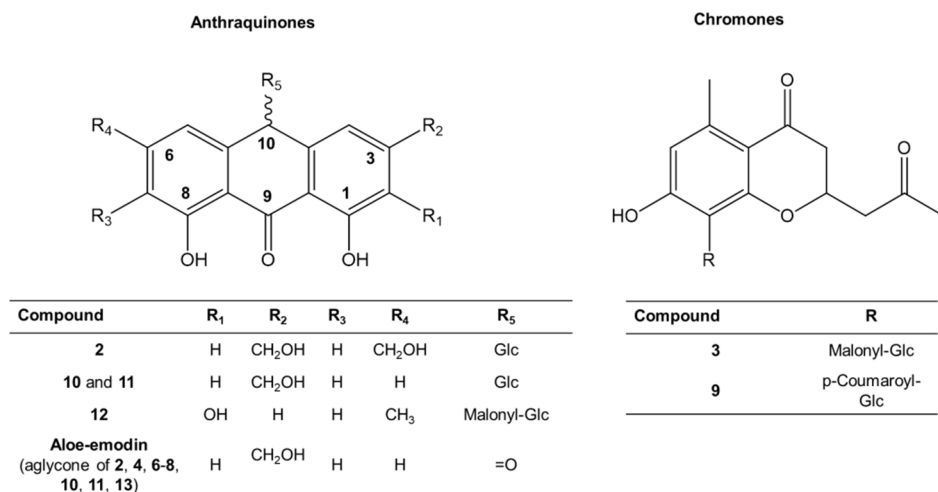

**Figure 3b.** Structure of the compounds identified in the selected *Aloe vera* leaf waste extracts using LC-MS analysis.
