# Supplementary material for: From Aloe vera Leaf Waste to the Extracts with Biological Potential: Optimization of the Extractions, Physicochemical Characterization, and Biological Activities
Source: MDPI journal article supplement (doi:10.3390/plants12142744), 2023-07-24
Supplement: s1 [file s1]

**Table S1.** Statistical analysis of optimization of maceration, heat-, ultrasound-, and microwave-assisted extractions (HAE, UAE, and MAE, respectively) from *Aloe vera* leaf waste using 2<sup>3</sup> factorial design.

|                                   | Effect | Std. Err. | Effect<br>Estimates | Coeff. | Std. Err.<br>Coeff. | <i>p</i> |
|-----------------------------------|--------|-----------|---------------------|--------|---------------------|----------|
| <b>Maceration</b>                 |        |           |                     |        |                     |          |
| TPC* [mg GAE/g]                   |        |           |                     |        |                     |          |
| Constant                          |        |           |                     | 6.407  | 0.068               | 0.000    |
| Main factors                      |        |           |                     |        |                     |          |
| Solid-to-solvent ratio [g/mL] (1) | 2.251  | 0.136     | 16.555              | 1.125  | 0.068               | 0.000    |
| Solvent type (2)                  | -2.419 | 0.136     | -17.794             | -1.210 | 0.068               | 0.000    |
| Time [min] (3)                    | 1.849  | 0.136     | 13.601              | 0.925  | 0.068               | 0.000    |
| Interaction of two factors        |        |           |                     |        |                     |          |
| 1 by 2                            | -2.337 | 0.325     | -6.221              | -0.423 | 0.068               | 0.000    |
| 1 by 3                            | 0.434  | 0.325     | 0.484               | 0.033  | 0.068               | 0.634    |
| 2 by 3                            | 0.784  | 0.325     | -0.619              | -0.042 | 0.068               | 0.544    |
| <b>HAE</b>                        |        |           |                     |        |                     |          |
| TPC [mg GAE/g]                    |        |           |                     |        |                     |          |
| Constant                          |        |           |                     | 9.314  | 0.055               | 0.000    |
| Main factors                      |        |           |                     |        |                     |          |
| Solid-to-solvent ratio [g/mL] (1) | 1.031  | 0.109     | 9.431               | 0.515  | 0.055               | 0.000    |
| Solvent type (2)                  | 1.073  | 0.109     | 9.812               | 0.536  | 0.055               | 0.000    |
| Time [min] (3)                    | 0.096  | 0.109     | 0.877               | 0.048  | 0.055               | 0.393    |
| Interaction of two factors        |        |           |                     |        |                     |          |
| 1 by 2                            | -0.231 | 0.109     | -2.112              | -0.115 | 0.055               | 0.049    |
| 1 by 3                            | -0.061 | 0.109     | -0.556              | -0.030 | 0.055               | 0.585    |
| 2 by 3                            | 0.171  | 0.109     | 1.563               | 0.085  | 0.055               | 0.136    |
| <b>UAE</b>                        |        |           |                     |        |                     |          |
| TPC [mg GAE/g]                    |        |           |                     |        |                     |          |
| Constant                          |        |           |                     | 7.436  | 0.053               | 0.000    |
| Main factors                      |        |           |                     |        |                     |          |
| Solid-to-solvent ratio [g/mL] (1) | 1.585  | 0.106     | 14.881              | 0.792  | 0.053               | 0.000    |
| Solvent type (2)                  | 1.618  | 0.106     | 15.194              | 0.809  | 0.053               | 0.000    |
| Time [min] (3)                    | 1.452  | 0.106     | 13.629              | 0.726  | 0.053               | 0.000    |
| Interaction of two factors        |        |           |                     |        |                     |          |
| 1 by 2                            | -0.628 | 0.106     | -5.899              | -0.314 | 0.053               | 0.000    |
| 1 by 3                            | -0.642 | 0.106     | -6.024              | -0.321 | 0.053               | 0.634    |
| 2 by 3                            | 0.398  | 0.106     | 3.740               | 0.199  | 0.053               | 0.544    |
| <b>MAE</b>                        |        |           |                     |        |                     |          |

| TPC [mg GAE/g]                    |        |       |        |        |       |       |
|-----------------------------------|--------|-------|--------|--------|-------|-------|
| Constant                          |        |       |        |        |       |       |
|                                   |        |       |        | 7.687  | 0.068 | 0.000 |
| Main factors                      |        |       |        |        |       |       |
| Solid-to-solvent ratio [g/mL] (1) | 1.410  | 0.135 | 10.417 | 0.705  | 0.068 | 0.000 |
| Solvent type (2)                  | 0.342  | 0.135 | 2.524  | 0.171  | 0.068 | 0.022 |
| Time [min] (3)                    | 0.890  | 0.135 | 6.575  | 0.445  | 0.068 | 0.000 |
| Interaction of two factors        |        |       |        |        |       |       |
| 1 by 2                            | 0.105  | 0.135 | 0.776  | 0.052  | 0.068 | 0.448 |
| 1 by 3                            | 0.057  | 0.135 | 0.419  | 0.028  | 0.068 | 0.681 |
| 2 by 3                            | -0.108 | 0.135 | -0.800 | -0.054 | 0.068 | 0.434 |

\*TPC, total polyphenol content; GAE, gallic acid equivalent.
