# Supplementary material for: From Aloe vera Leaf Waste to the Extracts with Biological Potential: Optimization of the Extractions, Physicochemical Characterization, and Biological Activities
Source: MDPI journal article supplement (doi:10.3390/plants12142744), 2023-07-24
Supplement: s1 [file s1]

**Table S2.** The influence of extraction time on ABTS and DPPH radical scavenging activity, ferric reducing antioxidant power (FRAP), and cupric ion-reducing antioxidant capacity (CUPRAC) of *Aloe vera* leaf waste extracts obtained in maceration, heat-, ultrasound-, and microwave-assisted extractions (HAE, UAE, and MAE, respectively).

| Extraction techniques | Time [min] | antioxidant capacity             |                                  |                                    |                          |
|-----------------------|------------|----------------------------------|----------------------------------|------------------------------------|--------------------------|
|                       |            | ABTS<br>[ $\mu\text{mol TE/g}$ ] | DPPH IC <sub>50</sub><br>[mg/mL] | FRAP<br>[mmol Fe <sup>2+</sup> /g] | CUPRAC<br>[mmol TE/g]    |
| Maceration            | 30         | 1.80±0.13 <sup>a*</sup>          | 43.86±2.81 <sup>a</sup>          | 0.200±0.006 <sup>b</sup>           | 0.126±0.003 <sup>b</sup> |
|                       | 45         | 2.05±0.17 <sup>a</sup>           | 41.08±4.13 <sup>a</sup>          | 0.216±0.008 <sup>a</sup>           | 0.140±0.004 <sup>a</sup> |
|                       | 60         | 2.01±0.18 <sup>a</sup>           | 40.38±1.89 <sup>a</sup>          | 0.210±0.005 <sup>ab</sup>          | 0.128±0.002 <sup>b</sup> |
| HAE                   | 15         | 1.36±0.04 <sup>b</sup>           | 42.68±1.32 <sup>a</sup>          | 0.212±0.010 <sup>b</sup>           | 0.125±0.008 <sup>a</sup> |
|                       | 30         | 1.52±0.08 <sup>a</sup>           | 41.66±2.76 <sup>a</sup>          | 0.250±0.012 <sup>a</sup>           | 0.132±0.003 <sup>a</sup> |
|                       | 45         | 1.64±0.11 <sup>a</sup>           | 41.57±1.25 <sup>a</sup>          | 0.241±0.008 <sup>a</sup>           | 0.133±0.010 <sup>a</sup> |
| UAE                   | 5          | 1.35±0.17 <sup>a</sup>           | 42.56±2.44 <sup>b</sup>          | 0.157±0.001 <sup>b</sup>           | 0.112±0.003 <sup>b</sup> |
|                       | 15         | 1.40±0.20 <sup>a</sup>           | 35.91±3.04 <sup>a</sup>          | 0.243±0.007 <sup>a</sup>           | 0.127±0.001 <sup>a</sup> |
|                       | 30         | 1.35±0.22 <sup>a</sup>           | 33.38±1.10 <sup>a</sup>          | 0.149±0.002 <sup>c</sup>           | 0.125±0.007 <sup>a</sup> |
| MAE                   | 1          | 2.19±0.07 <sup>a</sup>           | 29.38±1.60 <sup>b</sup>          | 0.269±0.006 <sup>b</sup>           | 0.173±0.008 <sup>b</sup> |
|                       | 2          | 2.30±0.07 <sup>a</sup>           | 24.78±0.26 <sup>a</sup>          | 0.294±0.004 <sup>a</sup>           | 0.192±0.003 <sup>a</sup> |
|                       | 3          | 2.22±0.06 <sup>a</sup>           | 24.87±1.06 <sup>a</sup>          | 0.206±0.007 <sup>c</sup>           | 0.164±0.005 <sup>b</sup> |

\* Values with the same letter in each column showed no statistically significant difference ( $p>0.05$ ;  $n=3$ ; analysis of variance, Duncan's *post-hoc* test); TE, Trolox equivalents; IC<sub>50</sub>, the concentration of extract required to neutralize 50% of DPPH radicals.
